# Supplementary material for: Incipient Salinaziation: A Case Study in the Spring of Asclepieion of Lentas (Ancient Lebena), Crete
Source: Preprints.org preprint supplement (doi:10.20944/preprints202401.0317.v1), 2024-01-04
Supplement: Supplementary file 1 [file supplementary]

# ΓΕΩΛΟΓΙΚΗ ΤΟΜΗ ΓΕΩΤΡΗΣΗΣ

ΓΕΩΤΡΗΣΗ Υδροκιν  
ΙΔΙΟΚΤΗΤΗΣ Κοιν. Νερα  
ΠΕΡΙΟΧΗ Νερα  
ΘΕΣΗ

ΑΝΑΔΟΧΟΣ  
ΧΡΟΝΟΣ ΕΚΤ/ΣΗΣ Μαρτίος 1989  
ΓΕΩΤΡΥΠΑΝΟ "Ανταλός"  
ΥΨΟΜΕΤΡΟ

| ΓΕΩΛΟΓΙΚΗ ΤΟΜΗ |      | ΥΔΡΟΛΟΓΙΚΑ ΣΤΟΙΧΕΙΑ         |                     |               |                           |               | ΤΕΧΝΙΚΑ ΣΤΟΙΧΕΙΑ   |    | ΠΑΡΑΤΗΡΗΣΕΙΣ                                                          |
|----------------|------|-----------------------------|---------------------|---------------|---------------------------|---------------|--------------------|----|-----------------------------------------------------------------------|
| Βαθος σε μ     | Τόμη | ΛΙΘΟΛΟΓΙΚΗ ΠΕΡΙΓΡΑΦΗ        | Υδροφ. στρωμ. βάθος | Υδροστ. βάθος | Παροχή μ <sup>3</sup> /ωρ | Σταθμ. άνελης | Σελική Σωληνώση 6" | 6" |                                                                       |
| 5              |      | Φιλικός (Σειρά και Νερα)    |                     |               |                           |               |                    |    | Αρχική διάτρηση από 0.00 έως 40 μέτρα διάμετρο $\phi = 8\frac{1}{2}"$ |
| 10             |      |                             |                     |               |                           |               |                    |    |                                                                       |
| 15             |      |                             |                     |               |                           |               |                    |    | Μείωση με επιμέτρηση και φίλτρα χαλκού $\phi = 15"$                   |
| 20             |      | Κρηναφόρα (Σειρά και Νερα)  |                     |               |                           |               |                    |    |                                                                       |
| 25             |      |                             |                     |               |                           |               |                    |    |                                                                       |
| 30             |      |                             |                     |               |                           |               |                    |    |                                                                       |
| 35             |      | Σχιζομάζος (Σειρά και Νερα) |                     |               |                           |               |                    |    | Επιμέτρηση με επιμέτρηση και φίλτρα χαλκού $\phi = 15"$               |
| 40             |      |                             |                     |               |                           |               |                    |    | Επιμέτρηση με επιμέτρηση και φίλτρα χαλκού $\phi = 15"$               |
| 45             |      |                             |                     |               |                           |               |                    |    |                                                                       |
| 50             |      |                             |                     |               |                           |               |                    |    |                                                                       |
| 55             |      |                             |                     |               |                           |               |                    |    |                                                                       |
| 60             |      |                             |                     |               |                           |               |                    |    |                                                                       |
| 65             |      |                             |                     |               |                           |               |                    |    |                                                                       |
| 70             |      |                             |                     |               |                           |               |                    |    |                                                                       |
| 75             |      |                             |                     |               |                           |               |                    |    |                                                                       |
| 80             |      |                             |                     |               |                           |               |                    |    |                                                                       |
| 85             |      |                             |                     |               |                           |               |                    |    |                                                                       |
| 90             |      |                             |                     |               |                           |               |                    |    |                                                                       |
| 95             |      |                             |                     |               |                           |               |                    |    |                                                                       |
| 100            |      |                             |                     |               |                           |               |                    |    |                                                                       |

Q = 10 m<sup>3</sup>/h  
B = 25 m<sup>3</sup>/h  
Q = 10 m<sup>3</sup>/h  
B = 25 m<sup>3</sup>/h

Ο ΣΥΝΤΑΞΑΣ

ΜΙΑΜΟΥ  
ΑΡΧΑΙΟΤΗΤΕΣ  
ΑΓΕΝΤΑ
